# Supplementary material for: Study on formaldehyde gas-sensing of In2O3-sensitized ZnO nanoflowers under visible light irradiation at room temperature
Source: Royal Society of Chemistry journal article supplement (doi:10.1039/c2jm16105b), 2012-01-01
Supplement: c2jm16105b.pdf [file c2jm16105b.pdf]

## Supplementary Information:

Table 1. A detailed table listed the photoelectric gas sensors based on ZnO.

| Sample style                                               | Light    | Detection gas                      | Detection limitation |                      | Detection upper limitation |                      |
|------------------------------------------------------------|----------|------------------------------------|----------------------|----------------------|----------------------------|----------------------|
|                                                            |          |                                    | Concentration        | Sensitivity          | Concentration              | Sensitivity          |
| ZnO nanoribbons <sup>1</sup>                               | UV       | O <sub>2</sub>                     | 0.59Torr             | /                    | 14.11Torr                  | /                    |
|                                                            |          | H <sub>2</sub> O                   | 2.9 Torr             | /                    | 12.18Torr                  | /                    |
| ZnO <sup>2</sup>                                           | UV       | HCHO                               | 25ppm                | 2.4                  | 50ppm                      | 11.7                 |
| ZnO <sup>3</sup>                                           | UV       | CH <sub>3</sub> CH <sub>2</sub> OH | 10ppm                | 0.75                 | 60ppm                      | 0.8                  |
| ZnO nanorods <sup>4</sup>                                  | UV       | HCHO                               | 1.8ppm               | /                    | 1100ppm                    | /                    |
| Copper-doped ZnO <sup>5</sup>                              | UV       | CH <sub>3</sub> CH <sub>2</sub> OH | /                    | /                    | 1120 ppm                   | 64                   |
|                                                            |          | CH <sub>3</sub> COCH <sub>3</sub>  | /                    | /                    | 1120 ppm                   | 63                   |
| ZnO Ru(dcbpy) <sub>2</sub> (NCS) <sub>2</sub> <sup>6</sup> | UV       | HCHO                               | 5ppm                 | 0.9                  | 50ppm                      | 18.4                 |
|                                                            |          | CH <sub>3</sub> CH <sub>2</sub> OH | 5ppm                 | 0.4                  | 50ppm                      | 2.6                  |
|                                                            |          | CH <sub>3</sub> OCH <sub>3</sub>   | 5                    | 0.2                  | 50ppm                      | 0.8                  |
| ZnO/SnO <sub>2</sub> <sup>7</sup>                          | UV       | NO <sub>2</sub>                    | /                    | /                    | 500 ppb                    | 1266                 |
| TiO <sub>2</sub> -doped ZnO <sup>8</sup>                   | UV       | CH <sub>3</sub> CH <sub>2</sub> OH | 50ppm                | ΔV <sub>g</sub> =1.6 | 200ppm                     | ΔV <sub>g</sub> =1.8 |
| ZnO <sup>9</sup>                                           | λ=500 nm | PCBs                               | 1μM                  | 15%                  | 15μM                       | 50%                  |
| CdS/ZnO <sup>10</sup>                                      | λ>450 nm | HCHO                               | 110 ppm              | 126%                 | 660ppm                     | 381%                 |

Because of the traditional heated-treatment gas sensor has to be operated at high temperatures, and the high operation temperature restricts the application of gas sensor in many areas, such as explosive environment and low temperature environment. Therefore, the light irradiation is introduced, to get gas sensors to work at room temperature in recent years. As a new type of gas sensor, the research of photoelectric gas sensor is still on the exploratory stage. ZnO, with a wide band gap of 3.37 eV, only can be excited under UV light. Therefore, people by synthesized pure ZnO, Copper-doped ZnO, ZnO modified with Ru(dcbpy)<sub>2</sub>(NCS)<sub>2</sub>, ZnO/SnO<sub>2</sub> et al to detect gas under UV light irradiation. From the table 1, it can be seen that ZnO modified with Ru(dcbpy)<sub>2</sub>(NCS)<sub>2</sub> have a better response under UV light irradiation. Besides that, compared with pure ZnO,

Copper-doped ZnO have a better response. This is demonstrated that doped and sensitized can improve the response of ZnO. However, compared to the UV light region, there are much more energy which produced by the sunlight in the visible light region. In order to extend the photoelectric response of wide band gap semiconductors into the visible spectral range and utilize solar energy effectively, Zhai et al by synthesized CdS/ZnO to detect HCHO under visible light. But there are little reports about the photoelectric gas sensor under visible light irradiation until now. Therefore, in our paper, we try to synthesis  $\text{In}_2\text{O}_3$ -sensitized ZnO nanoflowers and detect HCHO under visible light irradiation.

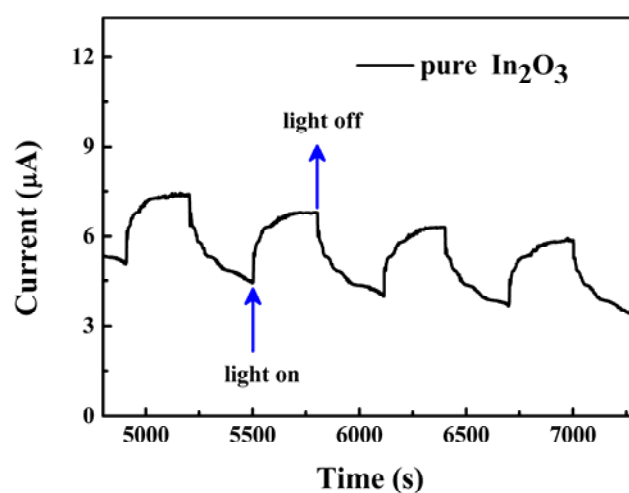

Fig.1. Surface photocurrent of the pure  $\text{In}_2\text{O}_3$  exposed to light on-off with a bias voltage of 10V under 460nm light illumination.

Among a variety of semiconductor,  $\text{In}_2\text{O}_3$  with a narrow indirect band gap which has an excellent electric conductance, transparency to visible light and good stability. But because of its narrow indirect band gap, the recombination of photo-generated electrons and holes can happen easily. Besides it,  $\text{In}_2\text{O}_3$  has an excellent electric conductance, and thus the current of  $\text{In}_2\text{O}_3$  which produced by photo-generated electrons is not obviously. The surface photocurrent of pure  $\text{In}_2\text{O}_3$  was detected and the result was shown in Fig.1. We can see that the current of pure  $\text{In}_2\text{O}_3$  under visible light irradiation is about 6.2  $\mu\text{A}$  and the current under the dark is about 4.2  $\mu\text{A}$ . Therefore, in our experiment, pure  $\text{In}_2\text{O}_3$  is not suitable for photoelectric gas sensor.

1. L. Peng, D. Wang, M. Yang, T. Xie and Q. Zhao, *Appl. Surf. Sci.* 2008, **254**, 2856-2860.

2. L. Peng, J. Zhai, D. Wang, Y. Zhang, P. Wang, Q. Zhao and T. Xie, *Sens. Actuators B: Chem.* 2010, **148**, 66-73.
3. J. Gong, Y. Li, X. Chai, Z. Hu and Y. Deng, *J. Phys. Chem. C* 2009, **114**, 1293-1298.
4. L. Peng, Q. Zhao, D. Wang, J. Zhai, P. Wang, S. Pang and T. Xie, *Sens. Actuators B: Chem.* 2009, **136**, 80-85.
5. L. Peng, T.-F. Xie, M. Yang, P. Wang, D. Xu, S. Pang and D.-J. Wang, *Sens. Actuators B: Chem.* 2008, **131**, 660-664.
6. L. Peng, P. Qin, Q. Zeng, H. Song, M. Lei, J. J. N. Mwangi, D. Wang and T. Xie, *Sens. Actuators B: Chem.* 2011, **160**, 39-45.
7. G. Lu, J. Xu, J. Sun, Y. Yu, Y. Zhang and F. Liu, *Sens. Actuators B: Chem.* 2012, **162**, 82-88.
8. Y. Gui, S. Li, J. Xu and C. Li, *J. Microelectron.* 2008, **39**, 1120-1125.
9. M. Li, G. Meng, Q. Huang, Z. Yin, M. Wu, Z. Zhang and M. Kong, *J. Lumin.* 2010, **26**, 13703-13706.
10. J. Zhai, D. Wang, L. Peng, Y. Lin, X. Li and T. Xie, *Sens. Actuators B: Chem.* 2010, **147**, 234-240.
